# Supplementary material
Source: publisher figshare collection journal article supplement (https://acs.figshare.com/ndownloader/files/4712626)
Supplement: Supplementary file 1 [file 4712626]

# **Supporting Information**

## **Solid state NMR study of amyloid nanocrystals and fibrils formed by the peptide GNNQQNY from yeast prion protein Sup35p**

Patrick C.A. van der Wel, Józef R. Lewandowski, Robert G. Griffin

### **Supporting information:**

- A selection of 2D spectra used for assigning the orthorhombic GNNQQNY crystal resonances.
- Assignment data illustrating the assignment of each of the three forms in a GNNQQNY fibril sample.

## 2D assignment data for orthorhombic GNNQQNY nanocrystals

Figure 1 shows a subset of the 2D data used to assign the GNNQQNY orthorhombic nanocrystal resonances. The measurements were performed at 700 MHz  $^1\text{H}$  frequency using isotopically dilute samples consisting of  $[\text{U-}^{13}\text{C}, ^{15}\text{N-GNNQ}]\text{QNY}$  (left) and  $\text{GNN}[\text{U-}^{13}\text{C}, ^{15}\text{N-QQNY}]$  (right).  $^{13}\text{C}$ - $^{13}\text{C}$  correlations on  $[\text{U-}^{13}\text{C}, ^{15}\text{N-GNNQ}]\text{QNY}$  were obtained via 1.6 ms RFDR mixing (using 50 kHz  $^{13}\text{C}$  power) at 15 kHz MAS. Broadband  $^{13}\text{C}$ - $^{13}\text{C}$  correlations on  $\text{GNN}[\text{U-}^{13}\text{C}, ^{15}\text{N-QQNY}]$  were determined using 8ms of homonuclear  $^{13}\text{C}$ -( $^1\text{H}$ )- $^{13}\text{C}$  TSAR-recoupling with the center frequency at 120.548 ppm and  $^{13}\text{C}$  and  $^1\text{H}$  powers of 42 kHz and 45 kHz respectively (Lewandowski, J. R., De Paëpe, G., Griffin, R. G. *J. Am. Chem. Soc.* **2007**, 129(4): 7-8).  $^{13}\text{C}$ - $^{15}\text{N}$  correlations were determined using NCO, NCOCX, NCA, and NCACX experiments analogous to those performed on the fibril samples, as described in the manuscript.

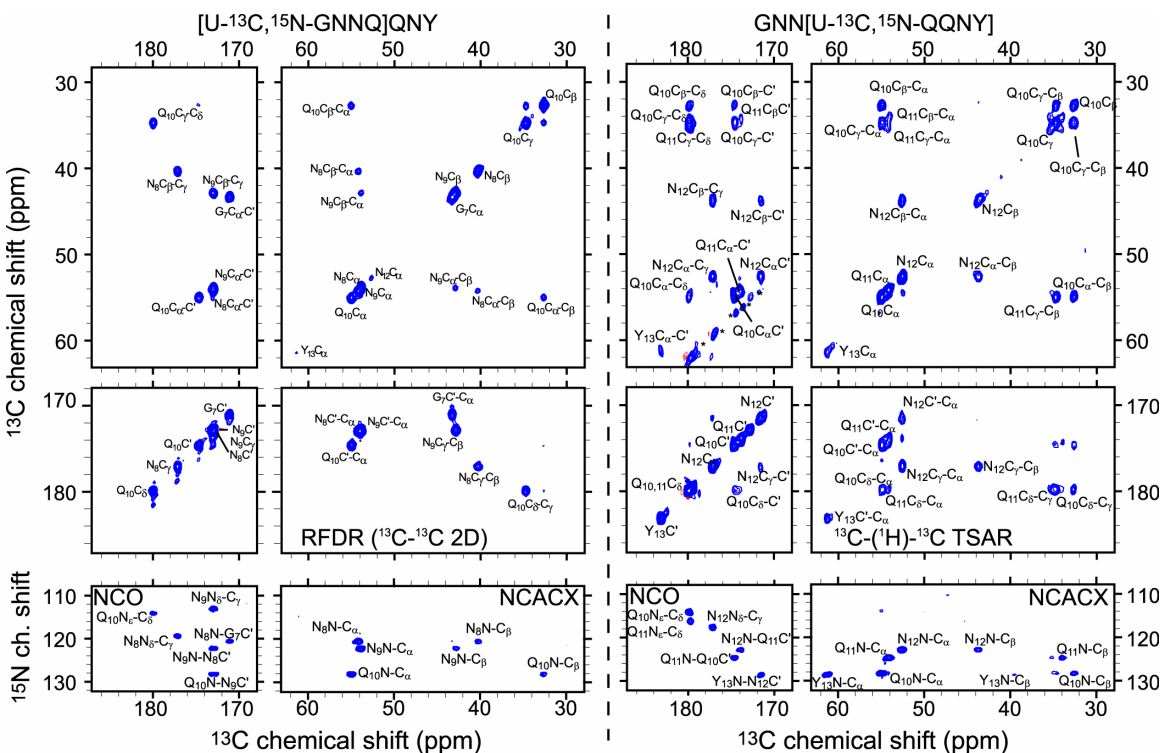

**Figure 1: 2D assignment data for orthorhombic nanocrystals of GNNQQNY. Spinning side bands are indicated with (\*).**

### ***Fibril assignment data***

The figures below show representative segments from our 2D assignment data on 100% labeled [U- $^{13}\text{C}$ ,  $^{15}\text{N}$ -GNNQ]QNY fibrils, obtained at 700 MHz. The assignments for each fibril form are indicated and traced out (solid lines indicate backbone correlations, dashed lines are side-chain correlations), with color-coding according to residue number. The top four panels are part of a  $^{13}\text{C}$ - $^{13}\text{C}$  correlation using 12 ms DARR/RAD mixing at 15 kHz MAS. The NCOCX and NCACX experiments were performed using 10ms  $^{13}\text{C}$ - $^{13}\text{C}$  DARR/RAD mixing, following the DCP N-C transfer, at 15 kHz MAS. Solid lines indicate backbone-backbone correlations, whereas dashed lines involve side chain-side chain, or backbone-side chain correlations. Very similar data were obtained for a number of other samples, which were prepared using isotopically dilute peptide material. Each of the fibril forms displays a self-consistent correlation pattern, while no cross-peaks are seen connecting the different forms to each other (even with longer DARR/RAD mixing times).

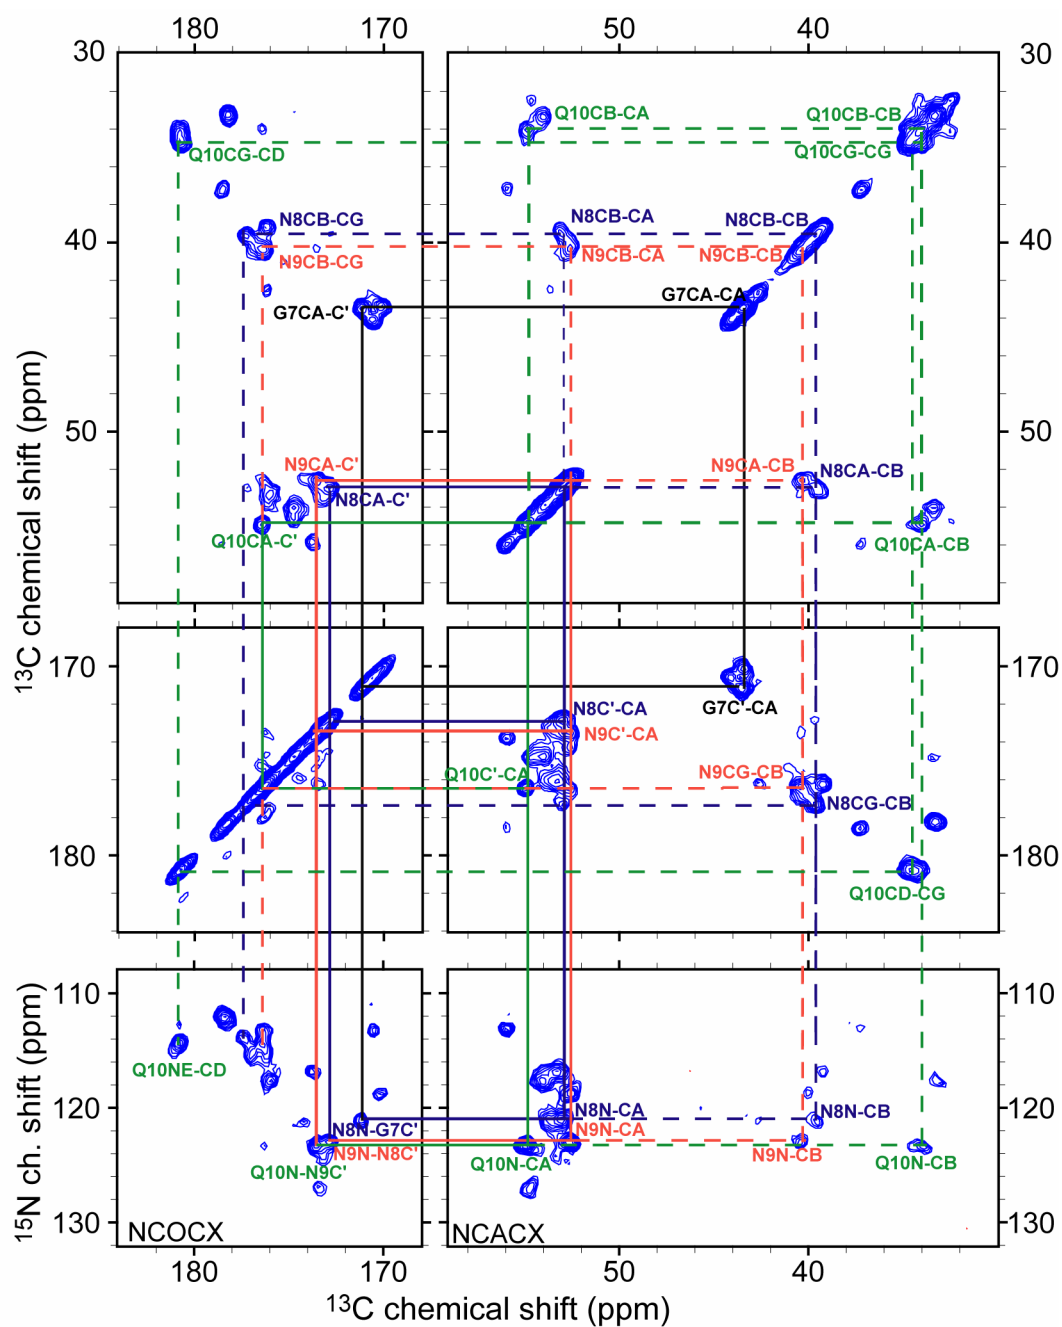

Figure 2: Correlation traces of fibril form 1 in 100%-labeled  $[U-^{13}\text{C}, ^{15}\text{N-GNNQ}]$ QNY fibrils.

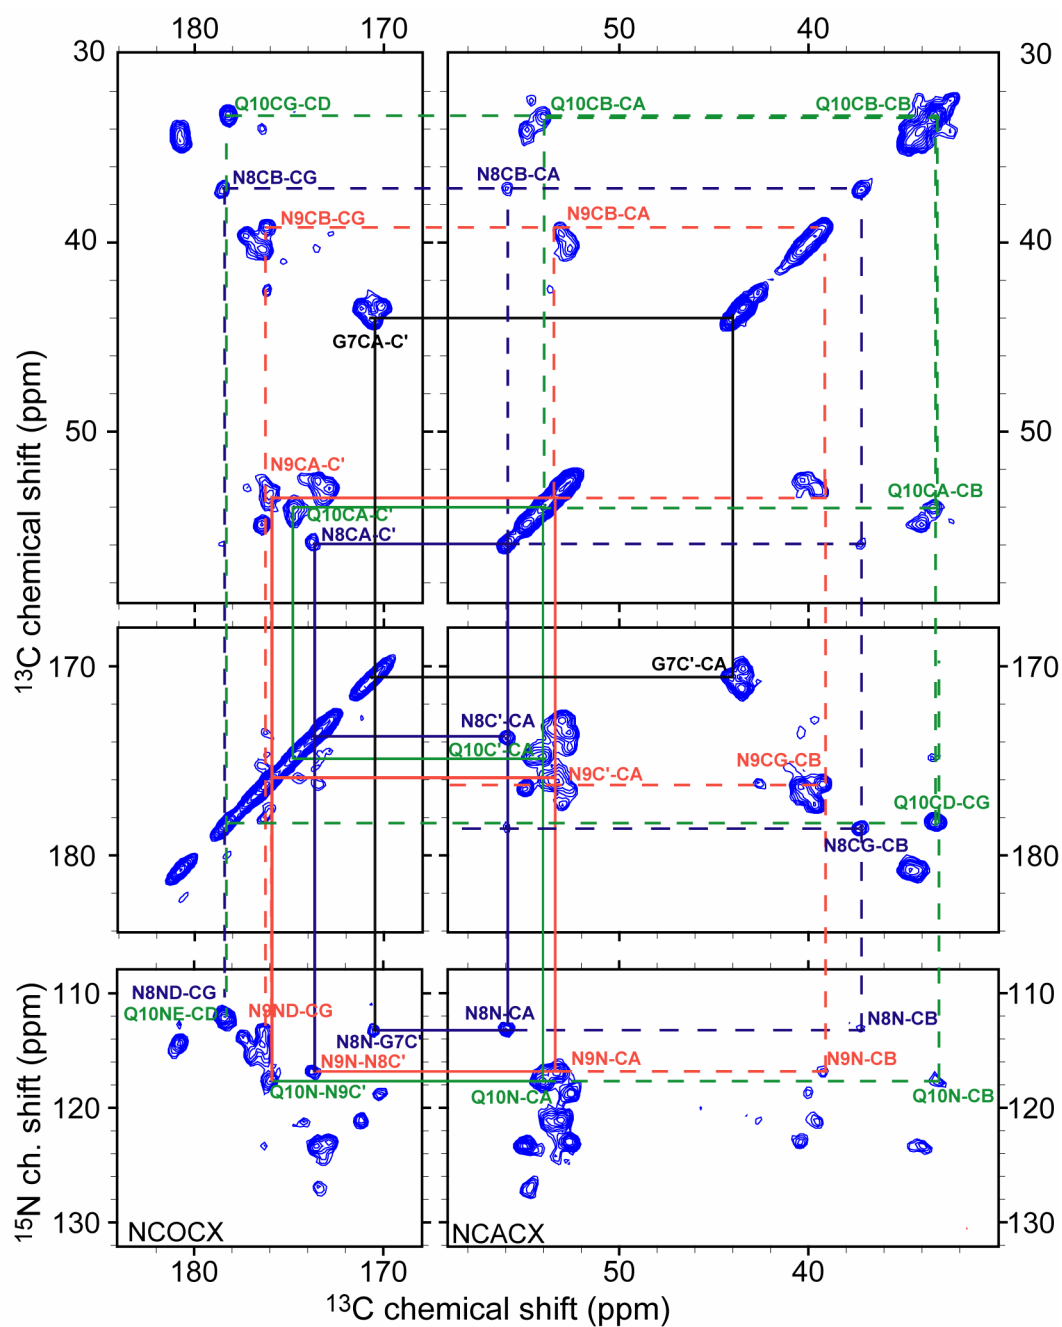

Figure 3: Correlation traces of fibril form 2 in 100%-labeled  $[U-^{13}\text{C}, ^{15}\text{N-GNNQ}]$ QNY fibrils.

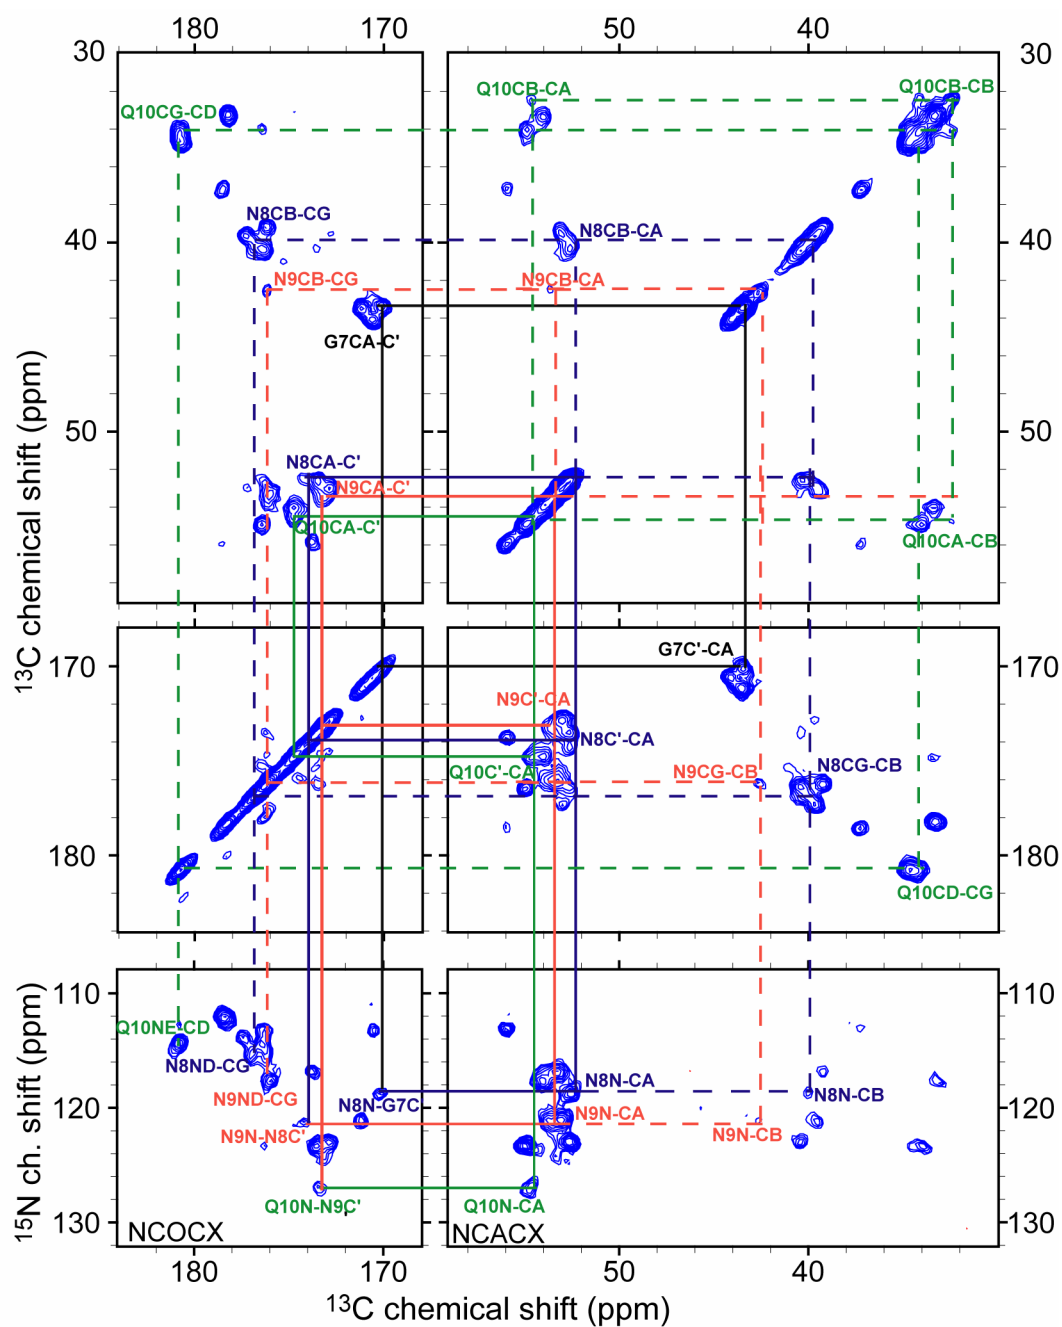

Figure 4: Correlation traces of fibril form 3 in 100%-labeled  $[U-^{13}\text{C}, ^{15}\text{N-GNNQ}]$ QNY fibrils.
